# Supplementary material for: Nitrite impacts the survival of Mycobacterium tuberculosis in response to isoniazid and hydrogen peroxide
Source: PubMed Central journal article supplement (PMC3892337; doi:10.1002/mbo3.126), 2013-09-08

# Figure 1

## INFECTED HUMAN MACROPHAGES

### A

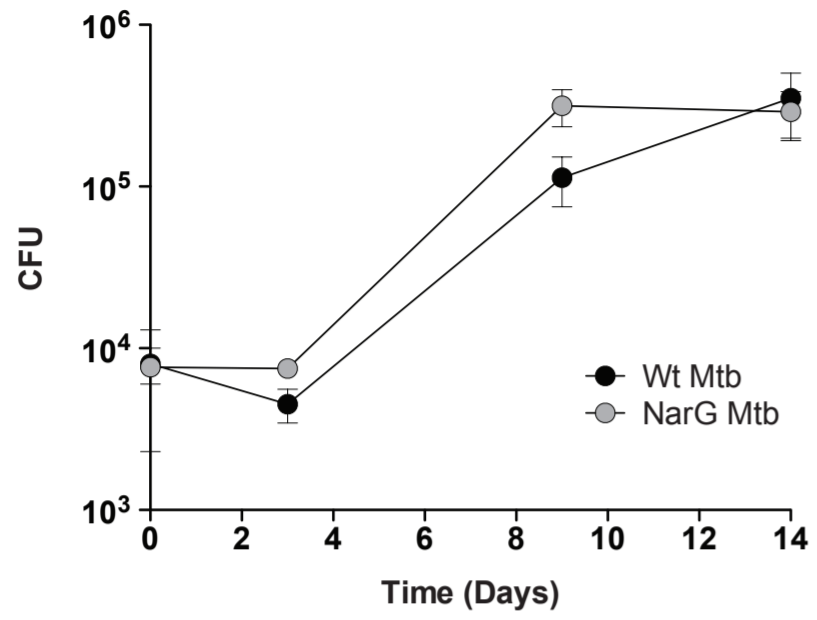

### B

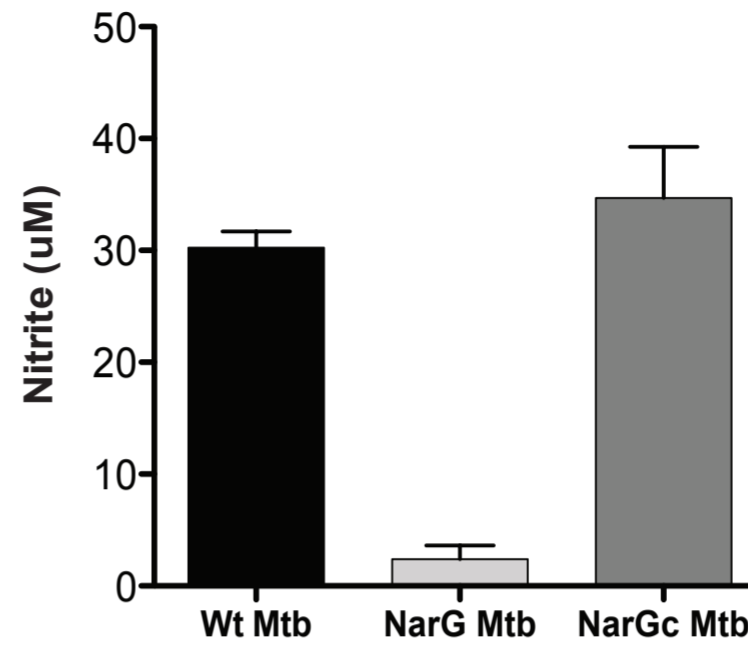

### C

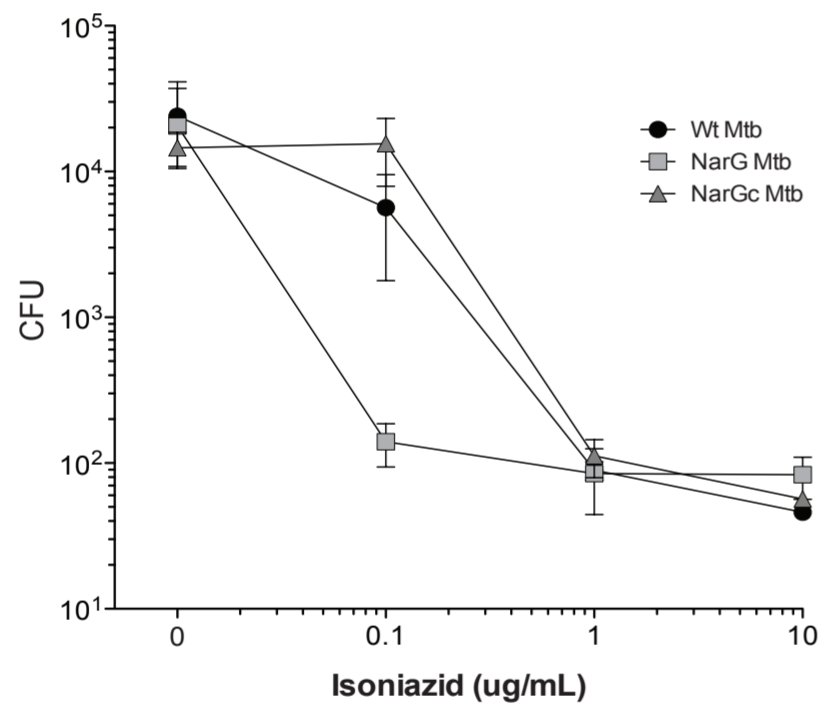

### D

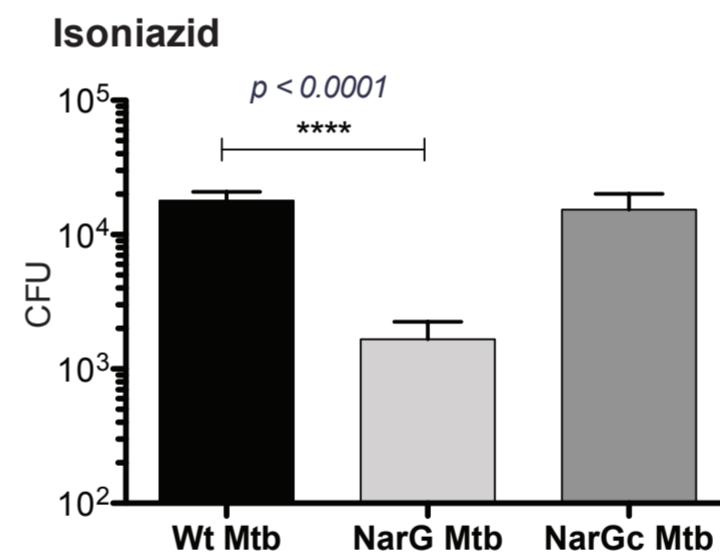

# Figure 2

INFECTED HUMAN MACROPHAGES

## A

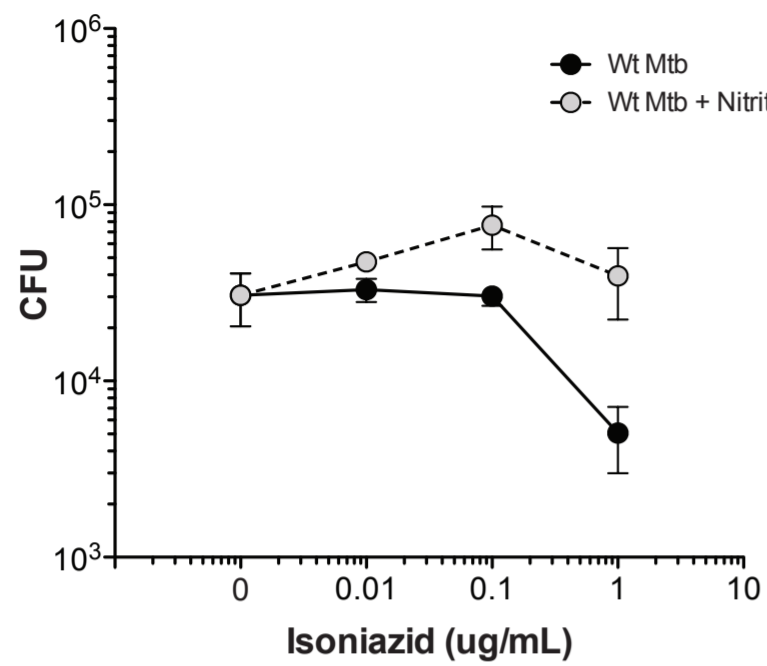

## B

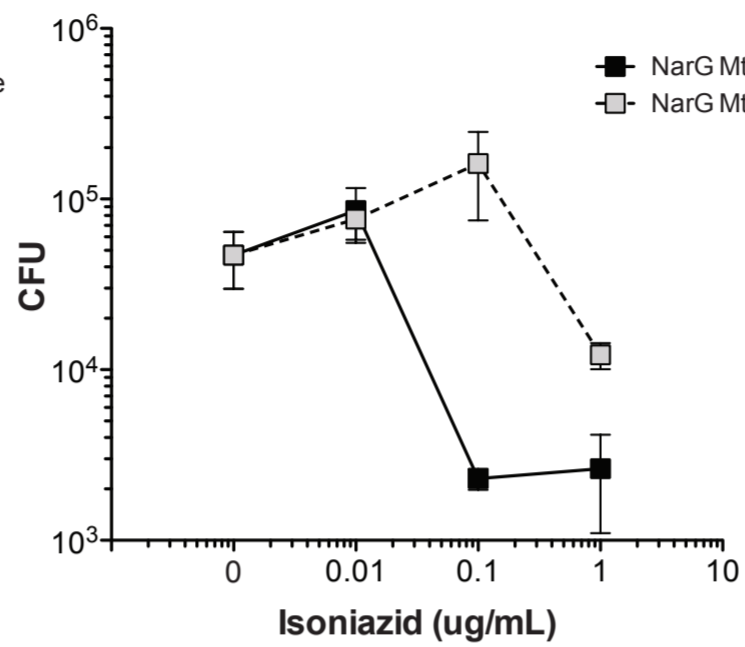

## C

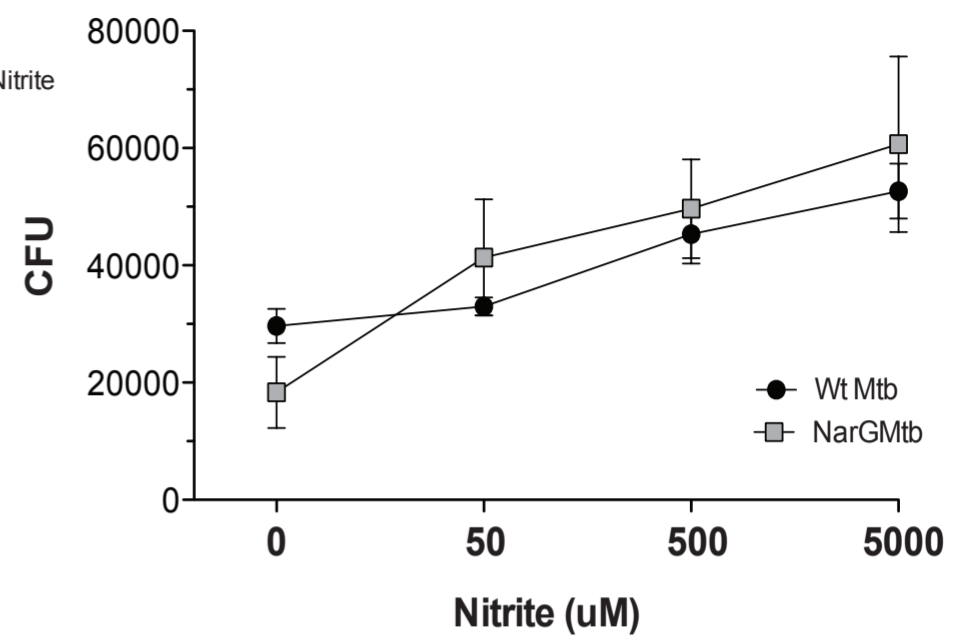

# Figure 3

## BROTH CULTURE OF MTB IN THE ABSENCE OF HUMAN MACROPHAGES

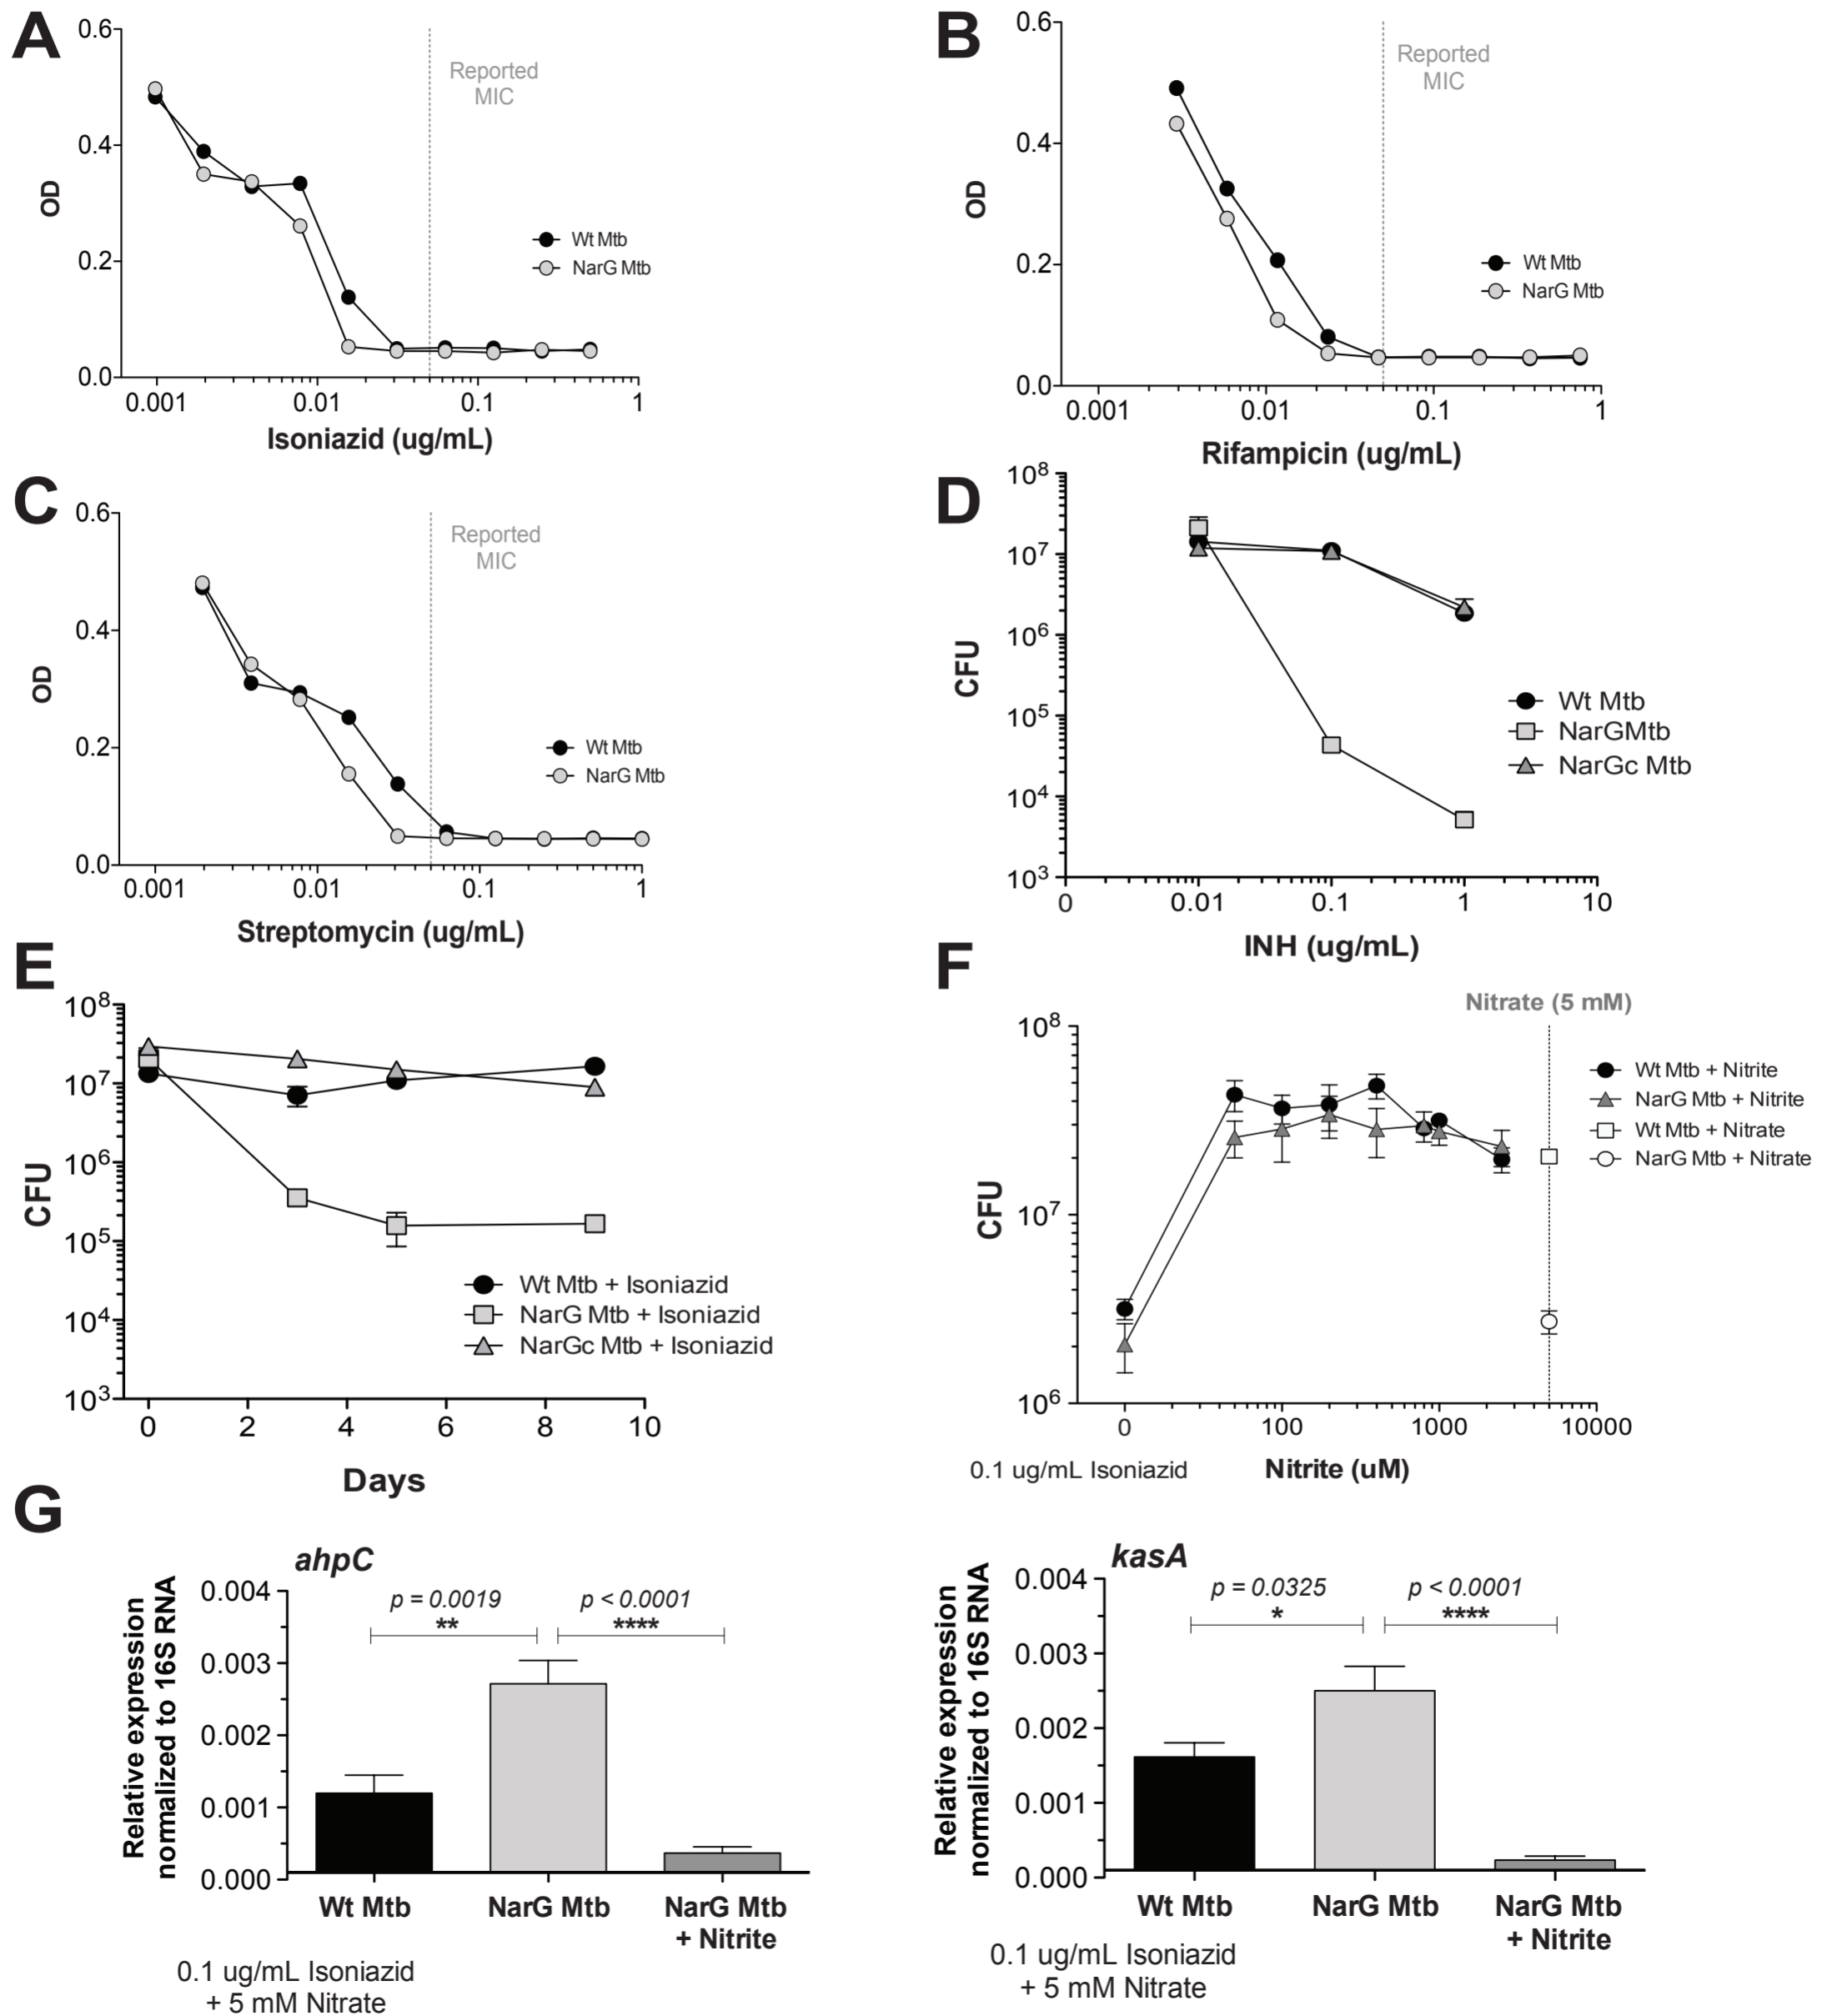

# Figure 4

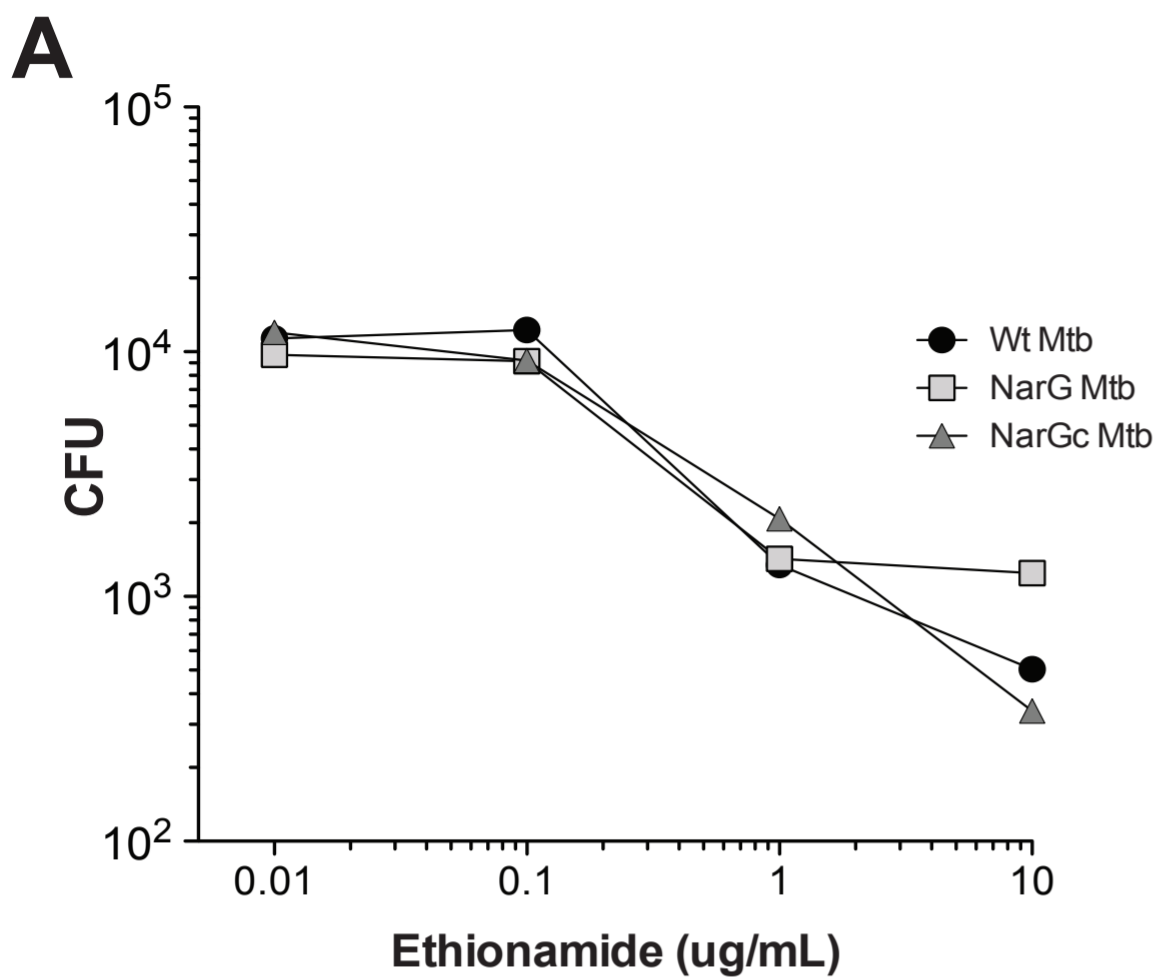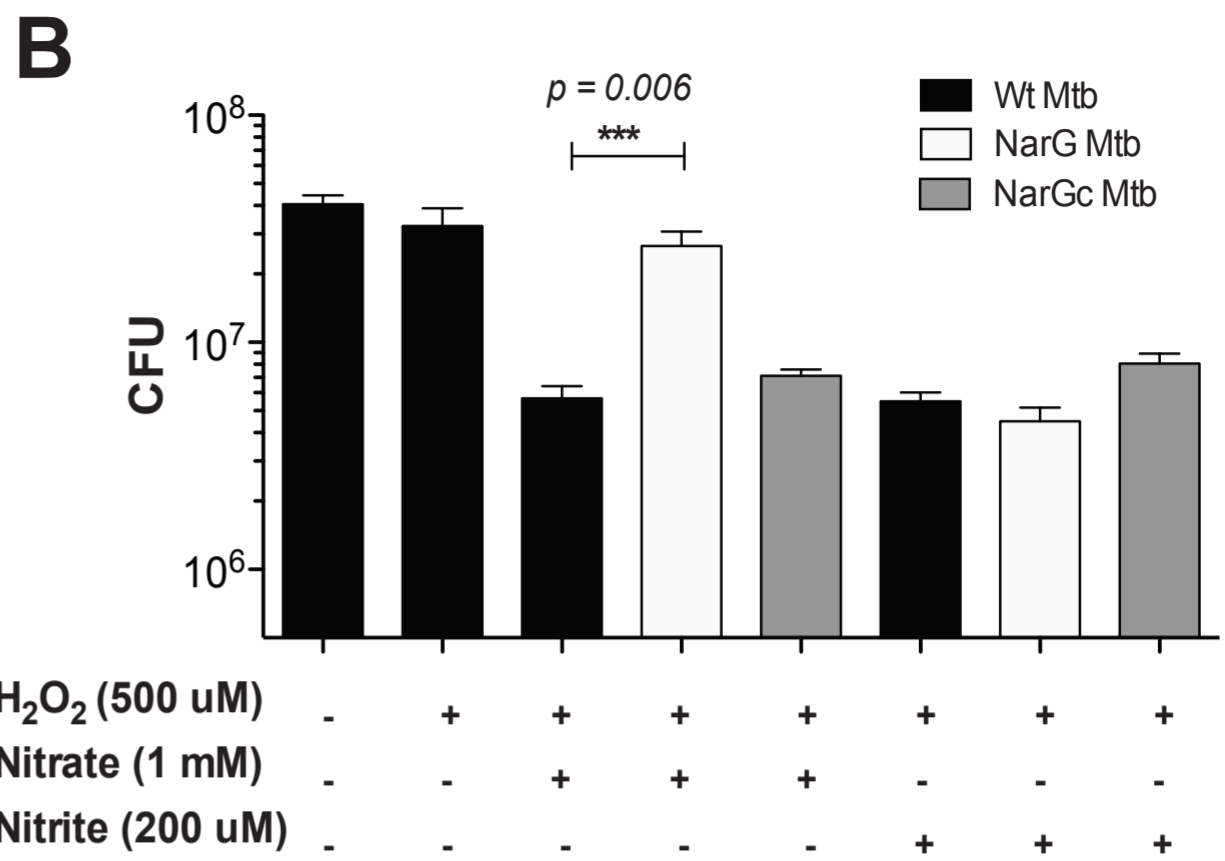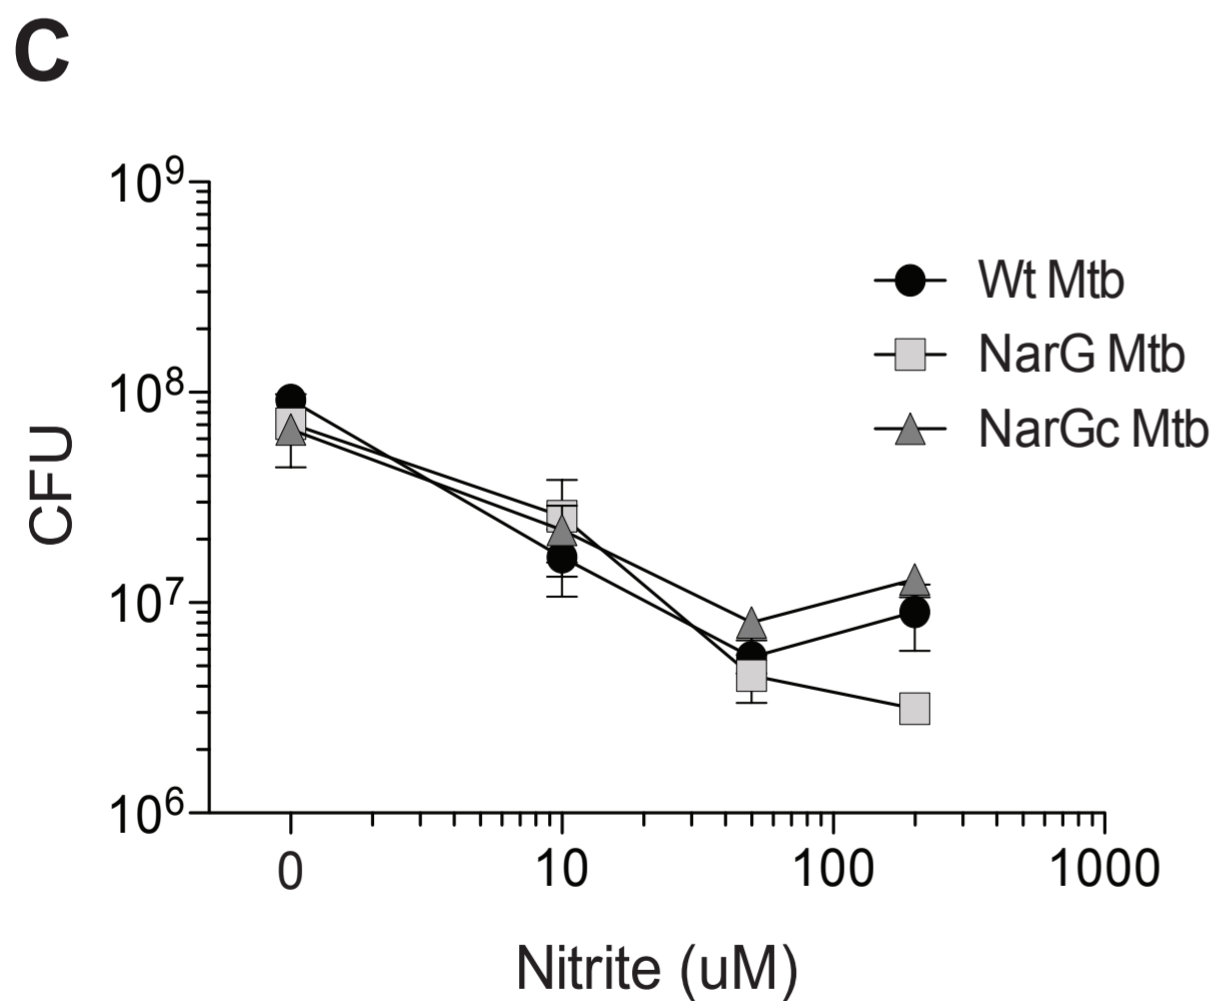

# Supplementary Figure 1

**A**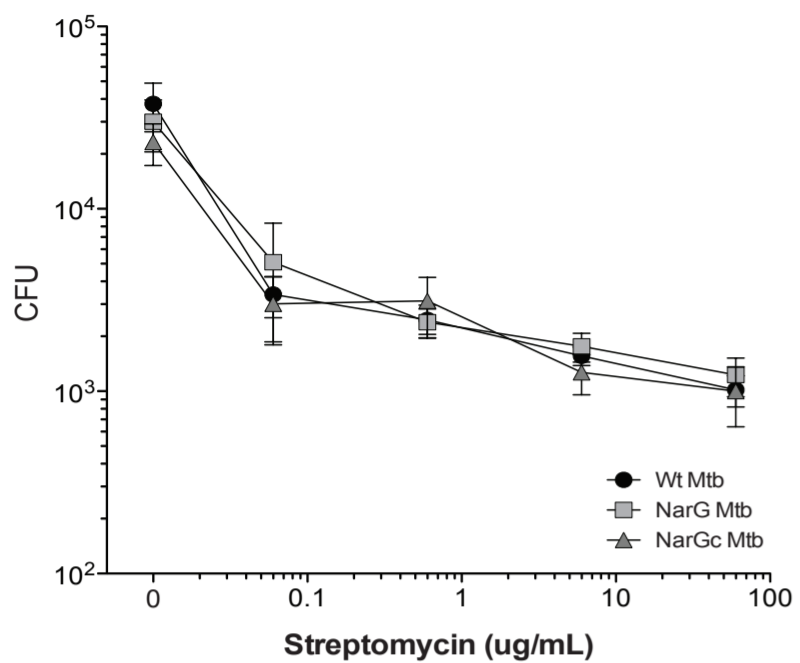**B**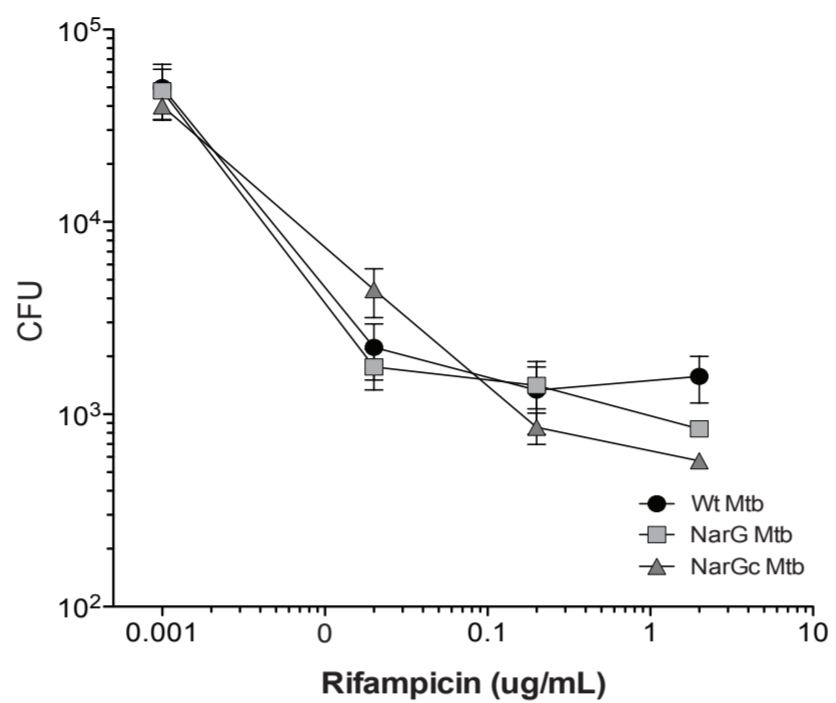**C**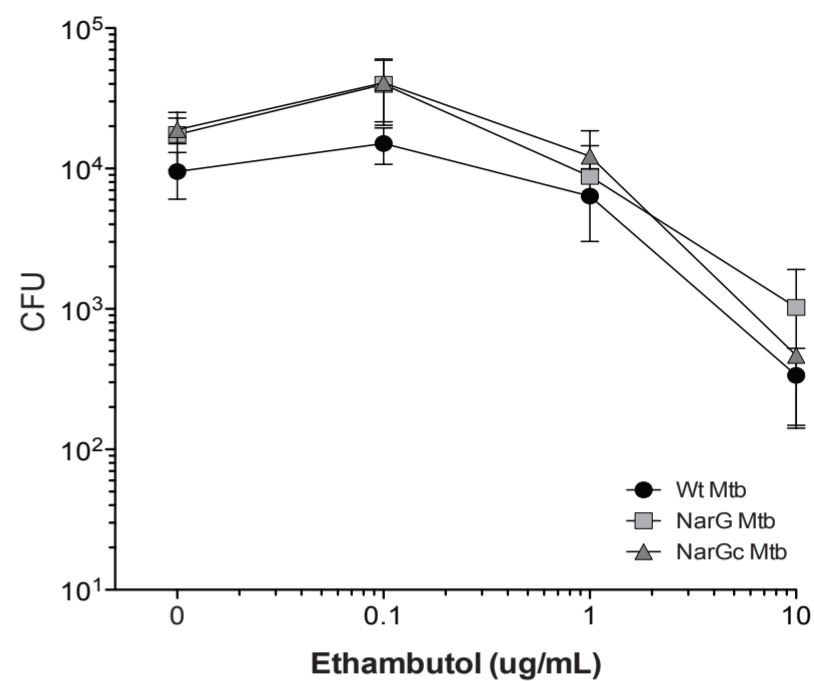**D****Streptomycin**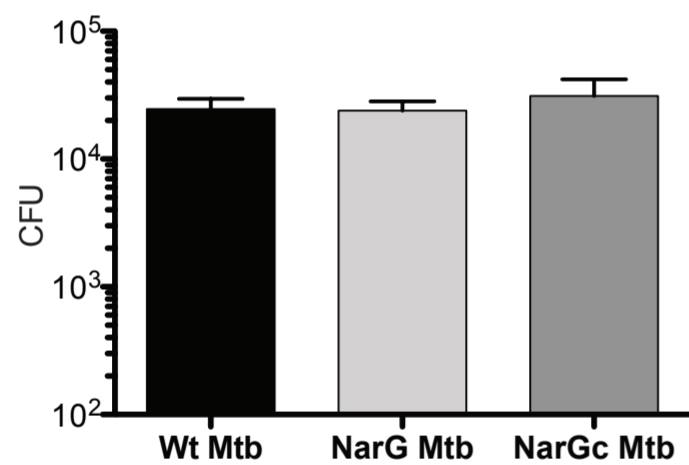**E****Rifampicin**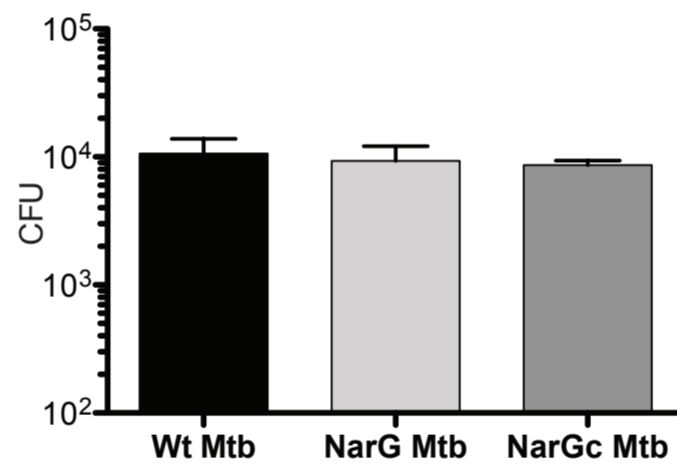**F****Ethambutol**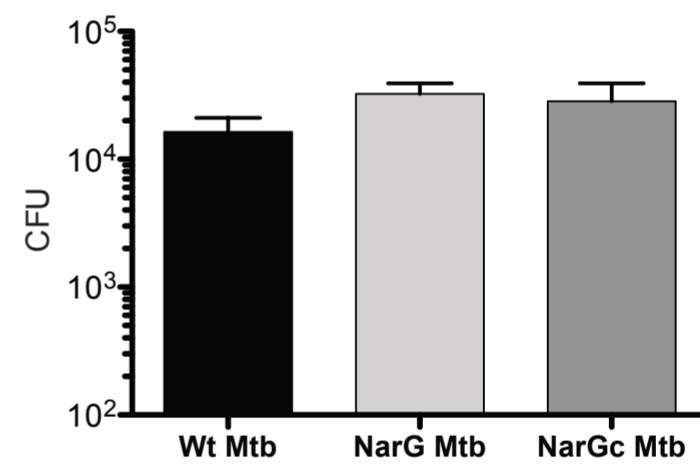

# Supplementary Figure 2

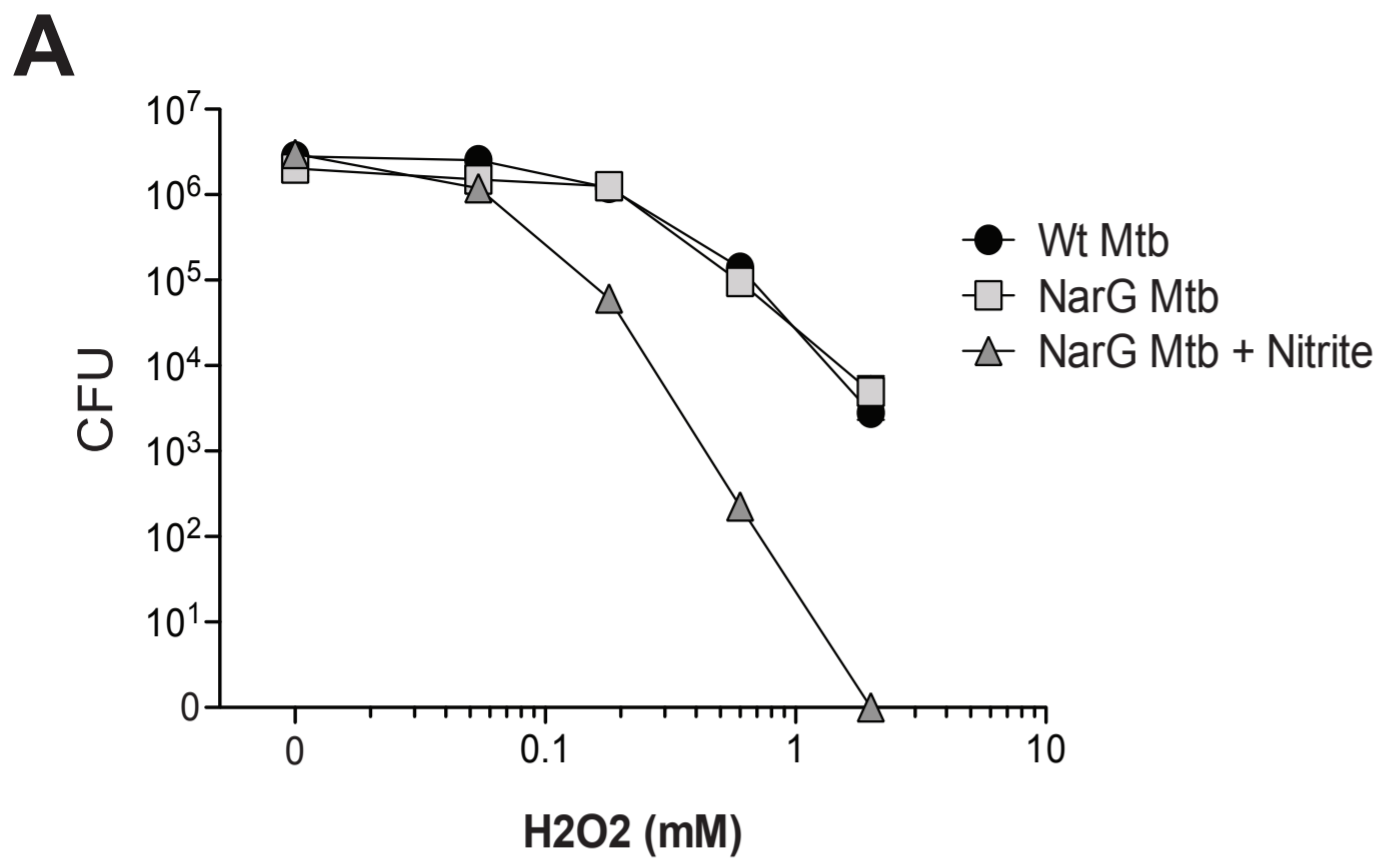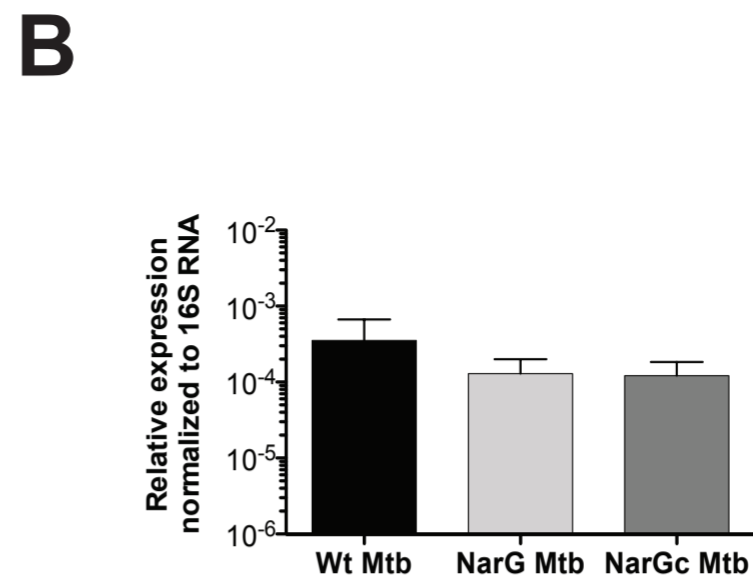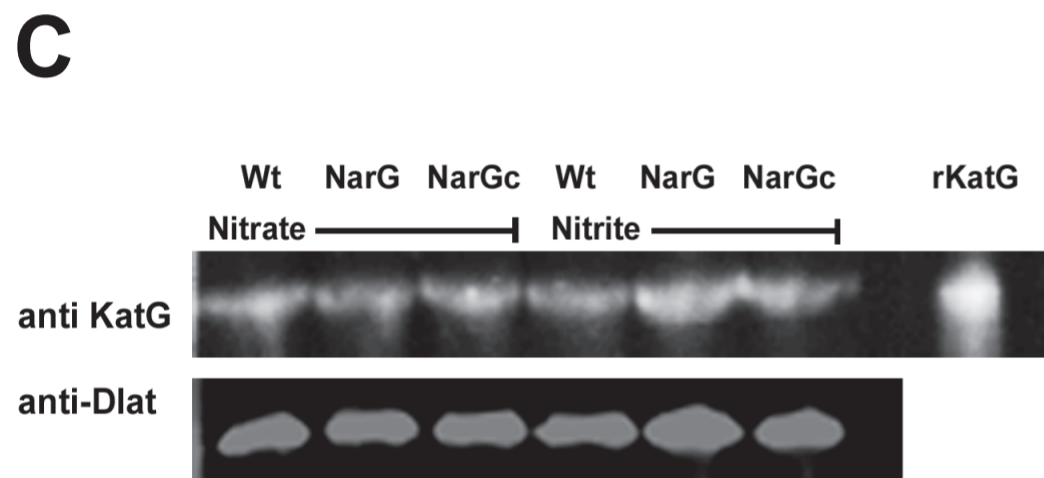

Supplement: mbo30002-0901-SD1.pdf [file mbo30002-0901-SD1.pdf]
